# 1 **Detecting Patient Position Using Bed-Reaction Forces and Monitoring** 2 **Skin-Bed Interface Forces for Pressure Injury Prevention and** 3 **Management**

4 Nikola Pupic<sup>1,2</sup>, Sharon Gabison<sup>1</sup>, Gary Evans<sup>1</sup>, Geoff Fernie<sup>1,2</sup>, Elham Dolatabadi<sup>3</sup>,  
5 Tilak Dutta<sup>1,2</sup>

6 <sup>1</sup>KITE Research Institute, Toronto Rehabilitation Institute – University Health Network,  
7 Toronto, Ontario, Canada

8 <sup>2</sup>Institute of Biomedical Engineering, University of Toronto, Toronto, Ontario, Canada

9 <sup>3</sup>Vector Institute, Toronto, Ontario, Canada

## 10 **Abstract**

11 **Abstract**  
12 Pressure injuries are largely preventable, yet they affect one in four Canadians across  
13 all healthcare settings. A key best practice to prevent and treat pressure injuries is to  
14 minimize prolonged tissue deformation by ensuring at-risk individuals are repositioned  
15 regularly (typically every 2 hours). However, adherence to repositioning is poor in  
16 clinical settings and expected to be even worse in homecare settings.

17 Our team has designed a position detection system for home use that uses machine  
18 learning approaches to predict a patient's position in bed using data from load cells  
19 under the bed legs. The system predicts the patient's position as one of three position  
20 categories: left-side lying, right-side lying, or supine. The objectives of this project were  
21 to: i) determine if measuring ground truth patient position with an inertial measurement  
22 unit can improve our system accuracy (predicting left-side lying, right-side lying, or  
23 supine) ii) to determine the range of transverse pelvis angles (TPA) that fully offloaded  
24 each of the great trochanters and sacrum and iii) evaluate the potential benefit of being  
25 able to predict the individual's position with higher precision (classifying position into  
26 more than three categories) by taking into account a potential drop in prediction  
27 accuracy as well as the range of TPA for which the greater trochanters and sacrum  
28 were fully offloaded.

29 Data from 18 participants was combined with previous data sets to train and evaluate  
30 classifiers to predict the participants' TPA using four different position bin sizes (~70°,  
31 45°, ~30°, and 15°) and the effects of increasing precision on performance, where  
32 patients are left side-lying at -90°, right side-lying at 90° and supine at 0°. A leave-one-  
33 participant-out cross validation approach was used to select the best performing  
34 classifier, which was found to have an accuracy of 84.03% with an F1 score of 0.8399.  
35 Skin-bed interface forces were measured using force sensitive resistors placed on the  
36 greater trochanters and sacrum. Complete offloading for the sacrum was only achieved  
37 for the positions with TPA angles <-90° or >90°, indicating there was no benefit to  
38 predicting with greater precision than with three categories: left, right, and supine.

## 39 **Keywords**

40 **Keywords**  
41 Pressure injuries, bed sores, machine learning, neural networks, prevention, healing,  
42 repositioning, skin-bed interface

43

## 44 **1 Introduction**

45 Pressure injuries (PIs), also known as bed sores or pressure ulcers, are largely  
46 preventable, yet they affect one in four Canadians across all healthcare settings (1). PIs  
47 are thought to be the result of prolonged deformation resulting from tissues being  
48 compressed between a support surface and a bony prominence (2); however, on a  
49 microscopic level, tissue deformation can occur within minutes (3,4). Deep tissue  
50 injuries are more related to the pressure force and superficial skin injuries are more  
51 related to the shear force (4).

52  
53 The deformation disrupts homeostasis at the cellular level, resulting in a positive  
54 feedback cycle of inflammation, ischemia, and cell death (3–5). The current practice for  
55 treating pressure injuries is to minimize the risk of prolonged deformation by  
56 repositioning patients every two hours to allow the compressed tissues to return to their  
57 normal state (3–6). Unfortunately, evidence suggests that adherence rates to  
58 repositioning schedules are poor in clinical environments (7–9) and are likely to be  
59 worse in homecare settings (10).

60  
61 The cost of PIs to the healthcare system is also enormous, with the estimated cost  
62 currently exceeding \$26.8 billion in the United States (11). These costs may soon  
63 increase as the COVID-19 pandemic has likely exposed more individuals to PI risks  
64 while being treated as in-patients in hospitals (3).

65  
66 To address the need for improved repositioning, Wong et al. (12) have developed a  
67 system that uses machine learning to detect the position of a simulated patient in bed  
68 based on data from load cells under each bed leg. The proof-of-concept work was able  
69 to detect healthy participant position (supine, left-side, or right-side) with 94.2%  
70 accuracy (n=20). When Wong et al.'s (12) model was tested on the data collected from  
71 nine older adults sleeping in their own beds at home, the accuracy dropped to ~88.5%.  
72 The drop in accuracy was suspected to be due to the large variations of sleeping  
73 positions that can be adopted. Additionally, this highlighted the importance of defining  
74 which areas of the pelvis are offloaded in different positions.

75  
76 The primary aim of this work was to improve the performance of our machine learning  
77 model using a pelvis-mounted Inertial Measurement Unit (IMU) to provide more  
78 accurate ground-truth labels than we previously had using time-lapse images of the  
79 individual in bed. The secondary aim was to determine the range of transverse pelvic  
80 angles that completely offloads the greater trochanter and the sacrum, where complete  
81 offloading indicates there is no force from the bed being applied to the area in question.  
82 These results were then used to evaluate the benefit of predicting an individual's  
83 position in bed with finer precision than supine, left, or right. This was achieved by  
84 specifying more narrow ranges of angles within which the participant position belonged  
85 to (i.e., a position held at 30° would fall into the 20° to 40° bin instead of the *Right* bin).

86  
87 The participant's position was defined by the angle of the pelvis with respect to the bed  
88 in the transverse plane, referred to as the transverse pelvic angle (TPA). Left-side,

89 supine, and right-side lying were represented by  $-90^\circ$ ,  $0^\circ$ , and  $90^\circ$ , respectively. Figure 1  
90 shows a visual representation of the TPA.  
91

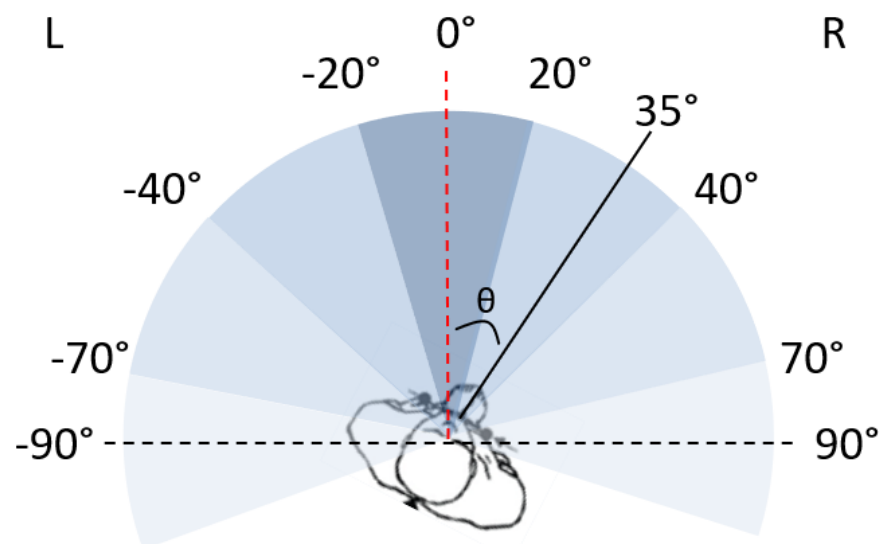

92  
93 **Figure 1.** The solid-coloured black line represents an individual's position on the bed in the  
94 transverse plane. This line is perpendicular to the line connecting the left and right anterior  
95 superior iliac spine bony landmarks on the individual. The dotted red line represents our  $0^\circ$  (true  
96 supine) reference point, and it is defined as the line perpendicular to the surface of the bed.  
97 Therefore, the TPA, represented by  $\theta$ , is defined as the angle between the  $0^\circ$  reference line and  
98 the line perpendicular to the anterior-posterior axis of the pelvis.

99 Figure 2 shows the different bin sizes that were tested to see the effects of increased  
100 precision on performance. A total of four different bin sizes were used. For the  $15^\circ$   
101 (Figure 2a) and  $45^\circ$  (Figure 2c) bins, all bins are the same size. However, for the  $\sim 30^\circ$   
102 (Figure 2b) and  $\sim 70^\circ$  (Figure 2d) bins, the bin size containing the  $0^\circ$  supine position was  
103 adjusted to avoid the bin boundaries coinciding with the positions that participants were  
104 asked to adopt.

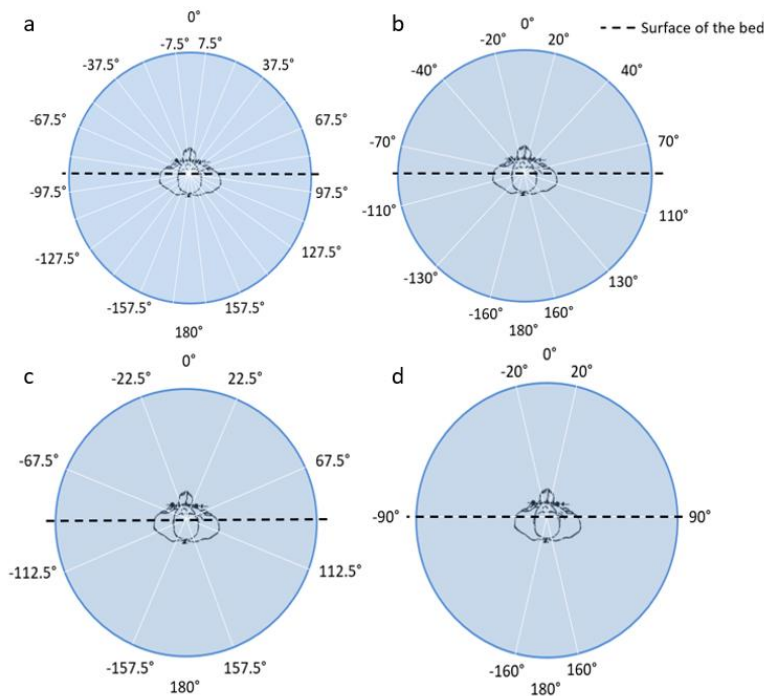

**Figure 2a.** 15° bins; **2b.** ~30° bins; **2c.** 45° bins; **2d.** ~70° bins

105  
106

107

## 108 **2 Methods**

### 109 **2.1 Participants**

110 A convenience sample of 20 healthy participants (10 males, 10 females) was recruited  
111 for this study. Able-bodied participants were included with no existing pressure injuries.  
112 All participants provided their informed consent, and the study protocol was reviewed by  
113 the Research Ethics Board of University Health Network.

114

### 115 **2.2 System Setup**

116 The instrumentation was set up in a similar manner to Wong et al. (12). Data was  
117 collected in CareLab, a simulated patient care environment located within Toronto  
118 Rehabilitation Institute (TRI), using a Carroll hospital bed (Carroll Hospital Group,  
119 Kalamazoo, MI). Single-axis load cells comprised of four load sensors (model DLC902-  
120 30KG-HB, Hunan Detail Sensing Technology, Changsha, Hunan, China) arranged in a  
121 full Wheatstone bridge circuit were placed under each of the four wheels of the bed. The  
122 load cell signals were amplified, filtered, and converted from analog to digital using a  
123 signal conditioner (GEN 5, AMTI, Watertown, MA) configured for 5.0 VDC excitation and  
124 a gain of 500 for each channel. NetForce software (version 3.5.2, AMTI, Watertown,  
125 MA) running on a laptop PC (Thinkpad T520, Lenovo, Hong Kong, China, 2.5 GHz Intel  
126 Core i5 CPU, 4 GB of RAM) was used to collect the load cell data at 50 Hz with 16-bit  
127 resolution. A camera was also positioned above the bed to capture ground truth video  
128 data of the participant positions.

129

130 Participants were fitted with three IMUs (Shimmer3, Shimmer Sensing, Dublin, Ireland)  
131 – one around the chest, one around the pelvis, and one around the arm in order to  
132 collect ground truth data for the sternal angle, pelvic angle, and heart rate, respectively.

133 The IMUs were connected to a laptop (Aspire 5, Acer, Xizhi, New Taipei, Taiwan,  
134 1.8GHz Intel Core i7 CPU, 12GB of RAM) via Bluetooth to ConsensysPRO (version  
135 1.6.0, Consensys, Dublin, Ireland) to collect data, visualize real-time transverse trunk  
136 and pelvic angles, and choose the sampling frequency (256 Hz).

137  
138 Participants were also fitted with three FSRs (model RP-S40-ST, Hilitand) in order to  
139 collect offloading data. The FSRs were connected to an Arduino board, which was  
140 connected to a laptop (Aspire 5, Acer, Xizhi, New Taipei, Taiwan, 1.8GHz Intel Core i7  
141 CPU, 12GB of RAM) using the Arduino software (Arduino, version 1.8.13, Boston, MA).  
142 Three LED lights (one for each sensor) were set up to indicate that the FSRs were  
143 recording properly.

### 144 2.3 Data Collection

146 The data was collected in two phases: a) the primary phase, where participants were  
147 instructed to cycle through a series of 11 unique positions at  $0^\circ$ ,  $\pm 15^\circ$ ,  $\pm 30^\circ$ ,  $\pm 45^\circ$ ,  $\pm 60^\circ$ ,  
148 and  $\pm 90^\circ$ ; and b) the random phase, where participants could assume any position they  
149 wanted to from  $-180^\circ$  to  $+180^\circ$  to account for the wide range of positions that can be  
150 adopted in bed. In addition, participants were asked to assume one prone position.

151  
152 All primary and random phase positions were held for three minutes. Figure 3 shows  
153 order of positions, including the intermediate positions (defined as positions held in  
154 between each three-minute hold,) that were held for one minute. The intermediate  
155 positions served as a way of standardizing the way pillows were inserted and removed  
156 for the primary phase.

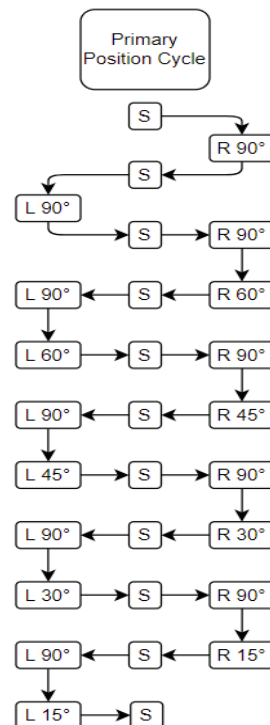

157  
158 **Figure 3.** The 11 different positions adopted by patients during primary testing and the order of  
159 positions, including Intermediate holds at supine, R90° and L90°.

160 Data from two participants was removed from the data set due to equipment  
161 malfunction.

162

## 163 2.4 Data Supplementation

164 Additional data was incorporated into the training set to increase the size of the data  
165 set. This additional data was only used to train machine and deep learning classifiers for  
166 the detection of supine, left, or right positions. The total data set used included 20,520  
167 observations of which 2,963 observations were from data collected in this study; 4,909  
168 observations were from the data collected by Wong et al. (12); and 12,918 observations  
169 were from data collected in the home environment by Gabison et al. (13).

170

## 171 2.5 Data Processing

172 *Load Cell Data* - Load cell signals were exported from Netforce and processed offline  
173 using MATLAB 2020a. The data was manually segmented into trials by removing  
174 sections where the participants were changing positions. Next, the center of mass of the  
175 bed-patient system was calculated using equations 1 and 2 below where CoM<sub>x</sub> and  
176 CoM<sub>y</sub> refer to the center of mass in the x (parallel to the short axis or width of the bed)  
177 and y (parallel to the long axis or length of the bed) directions, respectively. The data  
178 processing will be performed in the same manner as the study by Wong et al (12).  
179 Below is an explanation of how the data processing was executed, where LH

180

$$181 \text{CoM}_x = \frac{w}{2} \times \frac{LH+LF-RH-RF}{LH+LF+RH+RF} \quad \text{Equation 1}$$

$$182 \text{CoM}_y = \frac{l}{2} \times \frac{LH+RH-LF-RF}{LH+LF+RH+RF} \quad \text{Equation 2}$$

183

184 and RH correspond to the vertical forces measured by left and right sensors at the head  
185 of the bed respectively, LF and RF corresponds to the vertical forces measures by the  
186 left and right sensors at the foot of the bed respectively, and *l* and *w* refer to the  
187 distances between the load cells. To isolate the changes in the CoM signals associated  
188 with respiration, CoM<sub>x</sub> and CoM<sub>y</sub> signals were low pass filtered with personalized  
189 Chebyshev Type II filters. This filter was applied using MATLAB's `filtfilt` function  
190 (ensuring zero-phase shift) to obtain CoM<sub>resp\_x</sub> and CoM<sub>resp\_y</sub>. The times when  
191 maxima (*tmax*) and minima (*tmin*) occurred in the CoM<sub>resp\_x</sub> and CoM<sub>resp\_y</sub>  
192 signals were found by finding zero crossings for the first derivative of each signal. These  
193 times correspond with the end of each exhalation and inhalation respectively (14). The  
194 angle of the principal axis of the ellipsoid traced by the resultant CoM<sub>resp</sub> signal  
195 relative to the positive x axis (positive angle measured clockwise) was calculated using  
196 equation 3 for each *tmax* and subsequent *tmin*.

197

$$198 \text{CoM}_{resp\_ANG} = \arctan \left| \frac{\text{CoM}_{resp\_y}(t_{max}) - \text{CoM}_{resp\_y}(t_{min})}{\text{CoM}_{resp\_x}(t_{max}) - \text{CoM}_{resp\_x}(t_{min})} \right| \quad \text{Equation 3}$$

199

200 Finally, components of the signal that captured changes resulting from the cardiac cycle  
201 (rmsPulse) were isolated. MATLAB's `filtfilt` function was used to bandpass filter the sum  
202 of the LH and RH signals using a personalized equiripple finite impulse response filter.

203



204 Each data point used for training/testing the machine learning and deep learning  
205 classifiers was the average of a 45 s moving window (2250 observations) with a new  
206 value computed by shifting the window by 15 s. Since each pose was maintained for  
207 approximately 3 min, roughly 10 data points were calculated for each pose with each  
208 participant. Missing data from one participant was interpolated based on values from the  
209 same window.

210

211 *IMU Data* - The ground truth data was classified into one of three positions: right-side  
212 lying, left-side lying, or supine. The classifications were made based on a combination  
213 of Euler angles generated from the IMU data (data collected during this study), video  
214 data (data collected by Wong et al. (12)), and time-lapsed images (data collected in a  
215 home environment and classifications performed by 3 independent and blinded raters).  
216 The IMU data was further classified four more times using the generated Euler angles,  
217 once for each of the different bin sizes, to allow for more precise TPA detection.

218

219 *FSR Data* - Only FSR data from the primary phase was used for this analysis as the  
220 positions were consistent between all participants. The FSR data was manually  
221 annotated by the author to assign position codes using the video data as ground truth  
222 guidance. A total of 865,234 observations were collected. Sensor malfunctions  
223 (incorrect readings where the sensor reported maximum values when there was no  
224 force placed on it or no force when there was forced placed on it) and transitions  
225 (readings that occurred while positions were being changed and that have no use)  
226 resulted in 84,905 and 36,487 observations being removed, respectively. The final  
227 reported data set contained 743,932 observations.

228

229 The FSR data was converted from ADC values to Resistance (Kiloohms) using  
230 Equation 4 and then from Resistance (Kiloohms) to Force (grams) using Equation 5.

231

232 
$$Resistance = -0.00948(ADC) + 10 \quad \text{Equation 4}$$

233 
$$Force = \left( \frac{271}{Resistance} \right)^{\frac{100}{69}} \quad \text{Equation 5}$$

234

235 As the FSRs were attached to participants using tape, there was a constant force  
236 (approximately 120g) present on the sensors. This was referred to as the “tape bias”  
237 and was defined as the lowest recorded force value present. The tape bias was  
238 subtracted from the force measurements and the values were normalized by dividing all  
239 the recordings for a participant by the maximum achieved force reading for that  
240 participant. As such, all force values were reported as the percentage of maximum force  
241 at each position for the participant.

242

## 243 **2.6 Feature Selection**

244 The same features that Wong et al. (12) used to achieve an accuracy of 94.2% with  
245 their in-lab participant study were used. These features were extracted from the load  
246 cell data (Table 1).

247

248 **Table 1.** Features extracted by Wong et al.

| Feature              | Description                                                  | Feature                  | Description                                                                                                                            |
|----------------------|--------------------------------------------------------------|--------------------------|----------------------------------------------------------------------------------------------------------------------------------------|
| <i>meanCoM_x</i>     | The mean of <i>CoM_x</i>                                     | <i>CoM_resp_ANG</i>      | COM angle during inhalation phase only, averaged for all occurrences                                                                   |
| <i>meanCoM_y</i>     | The mean of <i>CoM_y</i>                                     | <i>stdCoM_resp_ANG</i>   | Standard deviation of <i>CoM_resp_ANG</i>                                                                                              |
| <i>ratio_meanCoM</i> | The quotient of <i>meanCoM_y</i> divided by <i>meanCoM_x</i> | <i>rmsCoM_resp_x</i>     | The root mean square of the x-component of <i>CoM_resp</i> during both inhale and exhale phases, normalized to the 97th percentile     |
| <i>stdCoM_x</i>      | The standard deviation of <i>CoM_x</i>                       | <i>rmsCoM_resp_y</i>     | The root mean square of the y-component of <i>CoM_resp</i> during both inhale and exhalation phases, normalized to the 97th percentile |
| <i>stdCoM_y</i>      | The standard deviation of <i>CoM_y</i>                       | <i>ratio_rmsCoM_resp</i> | The quotient of <i>rmsCoM_resp_y</i> divided by <i>rmsCoM_resp_x</i>                                                                   |
| <i>ratio_stdCoM</i>  | The quotient of <i>stdCoM_y</i> divided by <i>stdCoM_x</i>   | <i>rmsPulse</i>          | The root mean square of the load cell signals filtered to capture changes resulting from the cardiac cycle                             |

249

## 250 **2.7 Machine Learning Approach**

251 A two-part hierarchical classification approach was used (Figure 4), similar to the one  
 252 used by Liang et al. (15). Level 1 was trained on the final data set and tested only on  
 253 the new data to predict either supine, left, or right. After this classification, the new data  
 254 was divided into three separate smaller data sets based on its IMU ground truth label  
 255 (either supine, left, or right). The data from each of the three positions was fed into its  
 256 respective model for Level 2 classification, where the model specified a more precise  
 257 bin of angles that each position belonged to. Level 2 classification was repeated four  
 258 times, once for each bin size (15°, ~30°, 45°, ~70°).

259



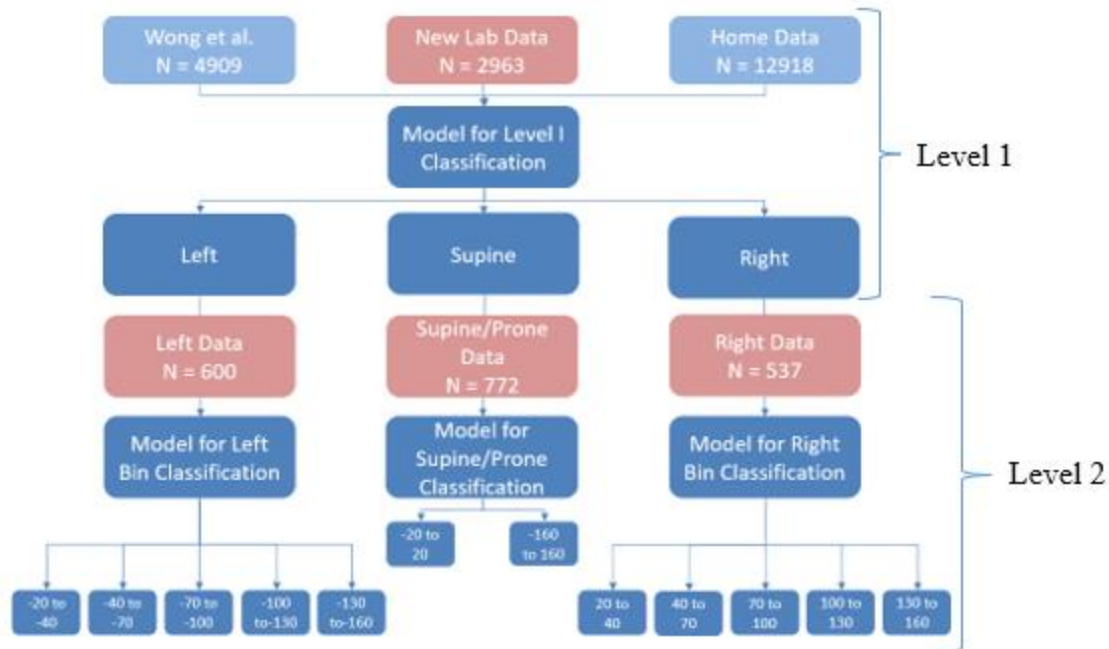

260  
261 **Figure 4.** Flow diagram of how the two levels of hierarchical classification work together, where  
262 the second level shows the example of a bin size of 30°.

263 Table 2 describes how the final data set was used for the classification tasks.

264

265 **Table 2.** Table describing the different data sources and how they were used.

| Data Source                           | Data Specifications                                                                         | Data Set Size (samples) | IMU | Data Use           | Hierarchy Level |
|---------------------------------------|---------------------------------------------------------------------------------------------|-------------------------|-----|--------------------|-----------------|
| Wong et al. (Lab Data)                | 20 healthy participants                                                                     | 4909                    | No  | Training           | 1               |
| Home Data collected by our team       | 9 healthy participants collected at home and 1 healthy participant collected in a sleep lab | 12918                   | No  | Training           | 1               |
| New lab data collected for this study | 18 healthy participants                                                                     | 2963                    | Yes | Training & Testing | 1 and 2         |

266

267 **Leave-One-Participant-Out** - A leave-one-participant-out cross validation approach was  
268 used to evaluate the accuracy of the classifier, while maximizing the number of training  
269 observations. Using this method, a classifier was trained on a data set that incorporated  
270 17 participants and tested on the one excluded participant. This procedure was  
271 repeated 18 times, once for each participant. The overall performance measures were  
272 estimated from the averaged errors for each individual test sample.

273

274 **Incremental Learning** - Incremental learning was used to evaluate the potential of the  
275 classifier to adapt to the left-out participant. The classifier was trained using different

276 percentages of the left-out participant's data ( $c = 0, 10, 20, 30\%$ ). To maintain a uniform  
 277 test set, the left-out participant's data was split into a 30% incremental learning set, from  
 278 which different  $c$  values were added to the training set, and a 70% test set.

279  
 280 *Machine Learning Classifiers* - Table 3 shows a list of models used in both Level 1 and  
 281 2 classifications. For Level 1, both machine and deep learning models were used. For  
 282 Level 2, only machine learning models were used as there was not enough data to  
 283 warrant the use of deep learning.

284  
 285 **Table 3.** Table describing the models created, which level they were used for, and the features  
 286 they used.

| Model                                            | Level 1 Prediction | Level 2 Prediction | Features Used                                              |
|--------------------------------------------------|--------------------|--------------------|------------------------------------------------------------|
| Logistic Regression                              |                    | X                  | 12 features from Wong et al.                               |
| Support Vector Machine                           |                    | X                  | 12 features from Wong et al.                               |
| Gradient Boosting Classifier                     | X                  | X                  | Some of the 12 features from Wong et al.                   |
| AdaBoost Classifier                              | X                  | X                  | 12 features from Wong et al.                               |
| XGBoost Classifier                               | X                  | X                  | 12 features from Wong et al.                               |
| Light Gradient Boosting Machine Classifier       | X                  |                    | 12 features from Wong et al.                               |
| Multilayer Perceptron (x3)                       | X                  |                    | 12 features from Wong et al.                               |
| Recurrent Neural Network: Long Short-Term Memory | X                  |                    | 12 features from Wong et al. & Automatic feature selection |
| Convolutional Neural Network: 1-Dimensional      | X                  |                    | 12 features from Wong et al. & Automatic feature selection |

287  
 288 Three different MLP models were constructed to test Level 1 classification, where: MLP  
 289 1 was the original model used by Wong et al. []; MLP 2 was a large, hyperparameter  
 290 tuned model using keras.tuner; and MLP 3 was a simple MLP model. Tables 4, 5, and 6  
 291 describe the different model architectures.

292  
 293 **Table 4.** Table describing the architecture of MLP 1, the original MLP model used by Wong et al.  
 294 in their study. The dropout was set to 0.1 for all instances, the batch size was not specified, and  
 295 the learning rate was 0.001.

| Layers            | Number of Nodes | Activation Function |
|-------------------|-----------------|---------------------|
| Input             | 12              | ReLu                |
| Fully Connected 1 | 64              | ReLu                |
| Dropout 1         | N/A             | N/A                 |

|                       |     |         |
|-----------------------|-----|---------|
| Batch Normalization 1 | N/A | N/A     |
| Fully Connected 2     | 100 | ReLU    |
| Dropout 2             | N/A | N/A     |
| Batch Normalization 2 | N/A | N/A     |
| Output                | 3   | Softmax |

296  
 297 **Table 5.** Table describing the architecture of MLP 2, the hyperparameter tuned model. The  
 298 dropout was set to 0.1 for all instances, the batch size was 128, and the learning rate was  
 299 0.000417.

| Layers                | Number of Nodes | Activation Function |
|-----------------------|-----------------|---------------------|
| Input                 | 12              | ReLU                |
| Fully Connected 1     | 128             | ReLU                |
| Dropout 1             | N/A             | N/A                 |
| Batch Normalization 1 | N/A             | N/A                 |
| Fully Connected 2     | 256             | ReLU                |
| Dropout 2             | N/A             | N/A                 |
| Batch Normalization 2 | N/A             | N/A                 |
| Fully Connected 3     | 160             | ReLU                |
| Dropout 3             | N/A             | N/A                 |
| Batch Normalization 3 | N/A             | N/A                 |
| Fully Connected 4     | 32              | ReLU                |
| Dropout 4             | N/A             | N/A                 |
| Batch Normalization 4 | N/A             | N/A                 |
| Output                | 3               | Softmax             |

300  
 301  
 302 **Table 6.** Table describing the architecture of MLP 3, the simplified tuned model. The dropout was  
 303 set to 0.1 for all instances, the batch size was 32, and the learning rate was 0.001.

| Layers                | Number of Nodes | Activation Function |
|-----------------------|-----------------|---------------------|
| Input                 | 12              | ReLU                |
| Fully Connected 1     | 12              | ReLU                |
| Dropout 1             | N/A             | N/A                 |
| Batch Normalization 1 | N/A             | N/A                 |
| Fully Connected 2     | 6               | ReLU                |
| Dropout 2             | N/A             | N/A                 |
| Batch Normalization 2 | N/A             | N/A                 |
| Fully Connected 3     | 4               | ReLU                |
| Dropout 3             | N/A             | N/A                 |
| Batch Normalization 3 | N/A             | N/A                 |
| Output                | 3               | Softmax             |

304  
 305 Tables 7 and 8 describe the architecture of the CNN and RNN, respectively.

306  
 307 **Table 7.** Table describing the architecture of the CNN model. The dropout was set to 0.2, 0.0,  
 308 0.05, and 0.45 for the four layers, respectively; the batch size was 16, and the learning rate was  
 309 0.00188.

| Layer           | Number of Filters | Size/Stride | Padding | Activation Function |
|-----------------|-------------------|-------------|---------|---------------------|
| Input           | 13                | N/A         | N/A     | ReLU                |
| Convolutional 1 | 32                | 1/2         | Same    | ReLU                |

|                       |     |     |      |         |
|-----------------------|-----|-----|------|---------|
| Dropout 1             | N/A | N/A | N/A  | N/A     |
| Batch Normalization 1 | N/A | N/A | N/A  | N/A     |
| Convolutional 2       | 32  | 7/4 | Same | ReLu    |
| Dropout 2             | N/A | N/A | N/A  | N/A     |
| Batch Normalization 2 | N/A | N/A | N/A  | N/A     |
| Convolutional 3       | 32  | 5/2 | Same | ReLu    |
| Dropout 3             | N/A | N/A | N/A  | N/A     |
| Batch Normalization 3 | N/A | N/A | N/A  | N/A     |
| Max Pooling 1         | N/A | 4/3 | Same | N/A     |
| Flatten 1             | N/A | N/A | N/A  | N/A     |
| Fully Connected 1     | 224 | N/A | N/A  | ReLu    |
| Dropout 4             | N/A | N/A | N/A  | N/A     |
| Batch Normalization 4 | N/A | N/A | N/A  | N/A     |
| Output                | N/A | N/A | N/A  | Softmax |

310  
311 **Table 8.** Table describing the architecture of the RNN model. The dropout was set to 0.35 for all  
312 instances, the batch size was 512, and the learning rate was 0.000933.

| Layer                 | Number of Nodes | Activation Function |
|-----------------------|-----------------|---------------------|
| Input                 | 13              | ReLu                |
| LSTM 1                | 96              | ReLu                |
| Dropout 1             | N/A             | N/A                 |
| Batch Normalization 1 | N/A             | N/A                 |
| LSTM 2                | 128             | ReLu                |
| Dropout 2             | N/A             | N/A                 |
| Batch Normalization 2 | N/A             | N/A                 |
| LSTM 3                | 256             | ReLu                |
| Dropout 3             | N/A             | N/A                 |
| Batch Normalization 3 | N/A             | N/A                 |
| LSTM 4                | 224             | ReLu                |
| Dropout 4             | N/A             | N/A                 |
| Batch Normalization 4 | N/A             | N/A                 |
| Fully Connected 1     | 32              | ReLu                |
| Dropout 5             | N/A             | N/A                 |
| Batch Normalization 5 | N/A             | N/A                 |
| Output                | 3               | Softmax             |

313  
314 **2.8 Statistical Analysis**

315 *Level 1 Classification* - The results were compared to identify any significant differences  
316 in the mean accuracy and mean F1 scores based on the best performing incremental  
317 learning level. Post-hoc tests, namely Wilcoxon Rank Sum test with Bonferroni  
318 corrections for multiple comparisons, were used to compare the top three performing  
319 models.

320  
321 Incremental learning levels were also compared for each of the top models to determine  
322 its impact on performance. Each incremental learning level was compared to its  
323 adjacent value(s) (i.e., 0% to 10%, 10% to 20%, and 20% to 30%).

324  
325 *Offloading Data* - The percentage of maximum load recorded in each position was  
326 compared for each of the three FSRs. The statistical analyses were performed twice for  
327 each sensor, for a total of six analyses, to compare all adjacent positions from 90° to 0°

328 and from 0° to -90° (i.e., Analysis 1 was the Right Trochanter Sensor for 90° to 0°;  
 329 Analysis 2 was the Right Trochanter Sensor for 0° to -90°; etc.). The data was  
 330 normalized to every participant for the calculations.

331  
 332 *Level 2 Classification* - The results from Level 2 Classification were compared to  
 333 determine the effect of bin size on model performance for right and left classification.  
 334 The best classifier from each bin size was compared to its adjacent bin size(s) (i.e., 70°  
 335 to 45°, 45° to 30°, and 30° to 15°).

### 337 **3 Results**

#### 338 **3.1 Participants**

339 Descriptive statistics of the 20 participants recruited for this study are provided in Table  
 340 9.

341  
 342 **Table 9.** Table showing the participant demographics. \*Note, participants 9 and 16 were included  
 343 in this table, but they were not included in the analysis as mentioned above.

| Participant | Sex (M/F) | Age Range (years) | Height (cm)  | Weight (kg) | BMI        |
|-------------|-----------|-------------------|--------------|-------------|------------|
| 1           | F         | 26-30             | 170.0        | 92.0        | 31.8       |
| 2           | M         | 71-75             | 172.7        | 75.2        | 25.1       |
| 3           | M         | 31-35             | 181.0        | 88.7        | 27.1       |
| 4           | M         | 41-45             | 181.0        | 99.8        | 30.4       |
| 5           | F         | 51-55             | 157.5        | 87.8        | 35.4       |
| 6           | F         | 21-25             | 157.5        | 50.3        | 20.3       |
| 7           | M         | 21-25             | 175.0        | 73.8        | 24.1       |
| 8           | M         | 26-30             | 165.0        | 65.5        | 24.1       |
| 9*          | F         | 21-25             | 169.0        | 77.8        | 27.2       |
| 10          | M         | 31-35             | 198.0        | 120.3       | 30.7       |
| 11          | F         | 21-25             | 161.3        | 62.6        | 24.1       |
| 12          | F         | 21-25             | 165.1        | 49.2        | 18.0       |
| 13          | F         | 21-25             | 175.0        | 57.4        | 18.8       |
| 14          | F         | 21-25             | 175.0        | 60.8        | 19.8       |
| 15          | F         | 21-25             | 170.0        | 63.7        | 22.1       |
| 16*         | F         | 21-25             | 165.0        | 42.8        | 15.7       |
| 17          | M         | 21-25             | 188.0        | 107.6       | 30.4       |
| 18          | M         | 21-25             | 179.0        | 81.8        | 25.5       |
| 19          | M         | 16-20             | 185.4        | 78.0        | 22.7       |
| 20          | M         | 21-25             | 183.0        | 88.5        | 26.4       |
| Mean ± (SD) |           | 29.8 ± 13.0       | 174.4 ± 10.6 | 77.9 ± 19.2 | 25.4 ± 4.7 |

344  
 345 **3.2 Level 1 Classification**  
 346 Tables 10 and 11 show the overall mean accuracy and F1 scores with their respective  
 347 standard deviation values across all 18 participants for the classification of supine, left,  
 348 and right for each incremental learning level. Since the ILL of 30% performed best, we  
 349 conducted our analyses on these models.

350

351 **Table 10.** Table describing the combined mean accuracy and standard deviations of the tested  
 352 models for Level 1 of the classification, which classifies positions as supine, left, or right.

| Model           | c = 0%          | c = 10%         | c = 20%         | c = 30%                |
|-----------------|-----------------|-----------------|-----------------|------------------------|
| ADA Mean        | 74.90% ± 16.04% | 74.73% ± 16.34% | 74.89% ± 16.52% | 74.54% ± 17.32%        |
| GBC Mean        | 38.03% ± 15.70% | 37.31% ± 15.99% | 37.89% ± 15.68% | 37.61% ± 15.83%        |
| LGB Mean        | 75.19% ± 15.27% | 79.46% ± 13.20% | 80.96% ± 12.68% | 81.70% ± 13.26%        |
| <b>XGB Mean</b> | 74.30% ± 16.07% | 79.04% ± 13.36% | 81.87% ± 13.46% | <b>84.03% ± 12.17%</b> |
| MLP 1 Mean      | 75.52% ± 16.12% | 75.83% ± 16.13% | 76.28% ± 14.33% | 76.35% ± 14.80%        |
| MLP 2 Mean      | 75.85% ± 15.45% | 78.08% ± 13.32% | 76.67% ± 13.84% | 78.83% ± 14.28%        |
| MLP 3 Mean      | 74.97% ± 18.60% | 75.67% ± 16.77% | 76.96% ± 16.74% | 76.65% ± 16.65%        |
| LSTM Mean       | 29.75% ± 8.19%  | 29.66% ± 7.99%  | 27.00% ± 7.40%  | 31.05% ± 8.16%         |
| CNN Mean        | 38.03% ± 1.81%  | 37.31% ± 4.94%  | 37.89% ± 1.47%  | 37.61% ± 1.66%         |

353 **Table 11.** Table describing the combined mean F1 scores and standard deviations of the tested  
 354 models for Level 1 of the classification, which classifies positions as supine, left, or right.  
 355

| Model           | c = 0%          | c = 10%         | c = 20%         | c = 30%                |
|-----------------|-----------------|-----------------|-----------------|------------------------|
| ADA Mean        | 0.7495 ± 0.1626 | 0.7478 ± 0.1662 | 0.7487 ± 0.1678 | 0.7463 ± 0.1749        |
| GBC Mean        | 0.7668 ± 0.1616 | 0.7692 ± 0.1651 | 0.7680 ± 0.1625 | 0.7731 ± 0.1637        |
| LGB Mean        | 0.7508 ± 0.1577 | 0.7950 ± 0.1331 | 0.8097 ± 0.1276 | 0.8176 ± 0.1331        |
| <b>XGB Mean</b> | 0.7425 ± 0.1642 | 0.7895 ± 0.1355 | 0.8181 ± 0.1356 | <b>0.8399 ± 0.1226</b> |
| MLP 1 Mean      | 0.6929 ± 0.1387 | 0.6980 ± 0.1141 | 0.6762 ± 0.1697 | 0.6841 ± 0.1485        |
| MLP 2 Mean      | 0.7574 ± 0.1707 | 0.7780 ± 0.1437 | 0.7665 ± 0.1467 | 0.7780 ± 0.1434        |
| MLP 3 Mean      | 0.7530 ± 0.1919 | 0.7499 ± 0.2024 | 0.7691 ± 0.1756 | 0.7641 ± 0.1764        |
| LSTM Mean       | 0.1423 ± 0.0673 | 0.1480 ± 0.0658 | 0.1197 ± 0.0607 | 0.1528 ± 0.0667        |
| CNN Mean        | 0.2232 ± 0.0294 | 0.2216 ± 0.0302 | 0.2194 ± 0.0215 | 0.2191 ± 0.0205        |

356 **Comparing Machine Learning Models** - The data was confirmed to be non-parametric. A  
 357 Friedman's ANOVA reported a significant difference between the mean accuracies:  
 358  $\chi^2(8) = 102.15$ ,  $p < 1 \times 10^{-15}$  and the mean F1 scores:  $\chi^2(8) = 115.13$ ,  $p < 1 \times 10^{-15}$ . Figures  
 359 5 and 6 depict the mean accuracies and F1 scores for all the models at an ILL of 30%.  
 360

361  
 362 Multiple post-hoc Wilcoxon Rank Sum tests with Bonferroni corrections were used to  
 363 compare the performances of the top three models (XGB, LGB, and MLP 2). For mean  
 364 accuracy, the comparison between MLP 2 vs. LGB was not significant:  $V = 32$ ,  $p =$   
 365  $0.0210$ . The comparisons between MLP 2 vs. XGB,  $V = 10$ ,  $p = 0.00178$ , and LGB vs.  
 366 XGB,  $V = 9$ ,  $p = 0.00152$ , were both significant. For mean F1 scores, all comparisons  
 367 were found to be statistically significant, MLP 2 vs. XGB:  $V = 2$ ,  $p = 0.000301$ ; MLP 2  
 368 vs. LGB:  $V = 11$ ,  $p = 0.0127$ ; LGB vs. XGB:  $V = 12$ ,  $p = 0.00245$ .  
 369



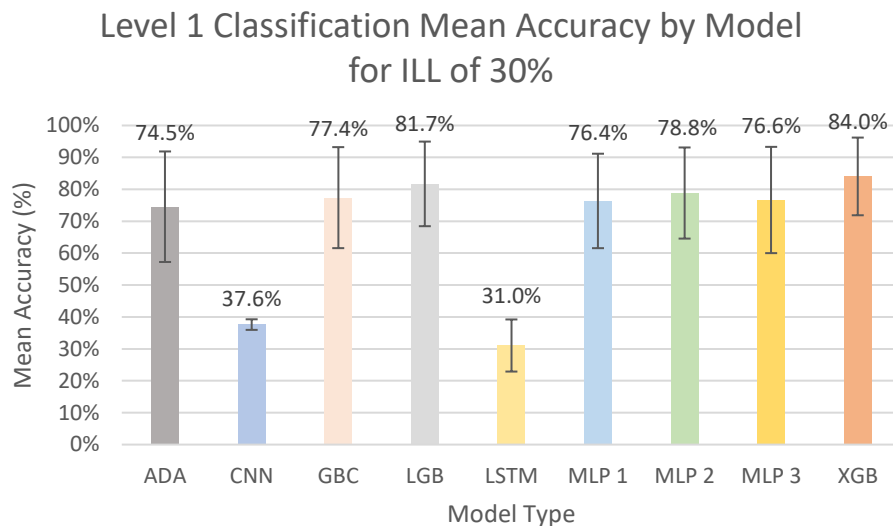

370 **Figure 5.** Graph of Level 1 classification mean accuracy for an ILL of 30%. The error bars  
371 represent standard deviation.  
372

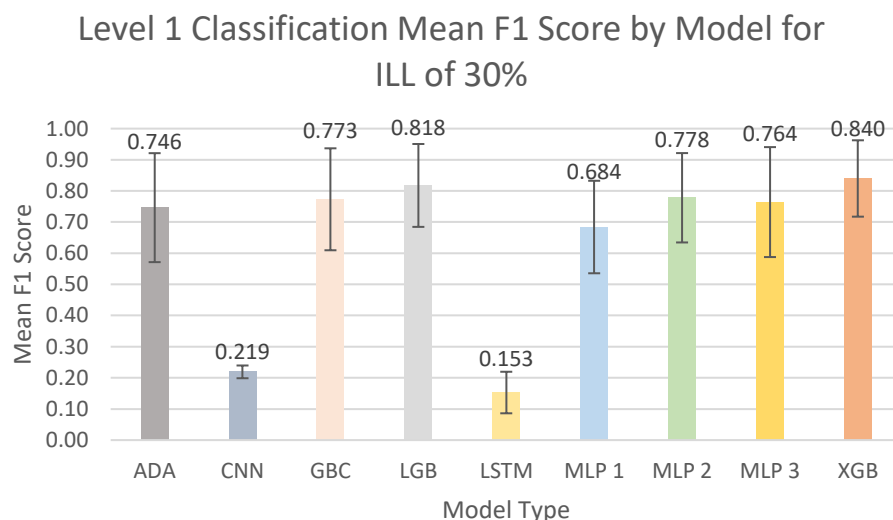

373 **Figure 6.** Graph of Level 1 classification mean F1 scores for an ILL of 30%. The error bars  
374 represent standard deviation.  
375

376 *Comparing Incremental Learning Levels* - The XGB data was confirmed to be non-  
377 parametric. A Friedman's ANOVA reported a difference between the mean accuracies:  
378  $\chi^2(3) = 37.01$ ,  $p < 1 \times 10^{-7}$  and the mean F1 scores:  $\chi^2(3) = 35.41$ ,  $p < 1 \times 10^{-7}$ . Figure 7a  
379 and 7b show a visual comparison between the mean accuracies and F1 scores of the  
380 different incremental learning levels for the XGB model.  
381

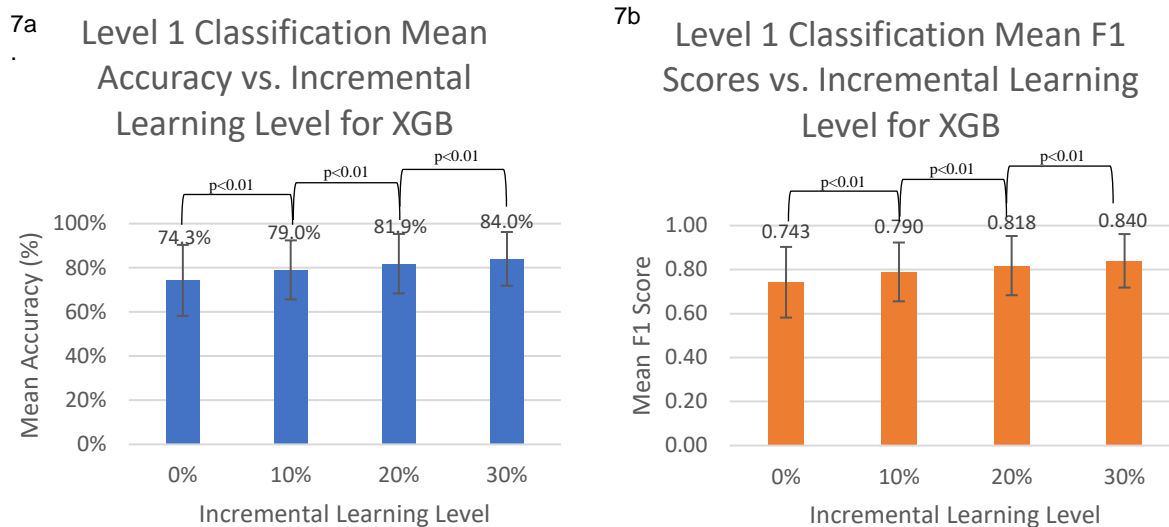

382  
 383 **Figure 7a.** Graph of Level 1 classification mean accuracy for the top three models across the  
 384 different ILLs. The error bars represent standard deviation; **7b.** Graph of Level 1 classification  
 385 mean F1 scores for the top three models across the different ILLs. The error bars represent  
 386 standard deviation.

387 Multiple post-hoc Wilcoxon Rank Sum tests with Bonferroni corrections were used to  
 388 compare the XGB ILLs. All comparisons were found to be statistically significant for both  
 389 mean accuracy and F1 scores. For accuracy, 0 vs. 10:  $V = 7$ ,  $p = 0.00287$ ; 10 vs. 20:  $V$   
 390  $= 15$ ,  $p = 0.00388$ ; 20 vs 30:  $V = 7$ ,  $p = 0.00176$ . For F1 scores, 0 vs. 10:  $V = 16$ ,  $p =$   
 391  $0.00266$ ; 10 vs. 20:  $V = 21$ ,  $p = 0.00532$ ; 20 vs. 30:  $V = 10$ ,  $p = 0.00178$ .

### 392 393 3.4 FSR Data

394 For the left and right trochanters, only the positions from  $-90^\circ$  to  $0^\circ$  and  $0^\circ$  to  $90^\circ$ ,  
 395 respectively, were assessed. This decision was made because a trochanter is  
 396 completely offloaded when a participant is on the opposite side, meaning the force  
 397 reading would be 0. The above does not hold true for the sacrum, so it was assessed  
 398 for the entire range of positions from  $-90^\circ$  to  $90^\circ$ .

399  
 400 *Left Trochanter* - The left trochanter loading data for positions  $-90^\circ$  to  $0^\circ$  was analyzed  
 401 and confirmed to be non-parametric. A Friedman's ANOVA was significant,  $\chi^2(5) = 71$ ,  
 402  $p < 1 \times 10^{-13}$ .

403  
 404 Multiple post-hoc Wilcoxon Rank Sum tests with Bonferroni corrections were used to  
 405 compare adjacent primary positions to determine if there was a difference in percentage  
 406 of maximum load. In total, five comparisons were made, changing the p-value needed  
 407 to reach significance to  $p < 0.01$ . Two of the comparisons were statistically significant  
 408 and two almost reached statistical significance,  $-90^\circ$  to  $-60^\circ$ :  $V = 106$ ,  $p = 0.051$ ;  $-60^\circ$  to  
 409  $-45^\circ$ :  $V = 132$ ,  $p < 0.001$ ;  $-45^\circ$  to  $-30^\circ$ :  $V = 22$ ;  $p = 0.016$ ;  $-30^\circ$  to  $-15^\circ$ :  $V = 136$ ,  $p < 1 \times 10^{-4}$ ;  
 410  $-15^\circ$  to  $0^\circ$ :  $V = 116$ ,  $p = 0.011$ .

411

412 Figure 8 shows the percentage of max load felt at the left trochanter as participants  
413 rotated through different positions and the significance between positions.  
414

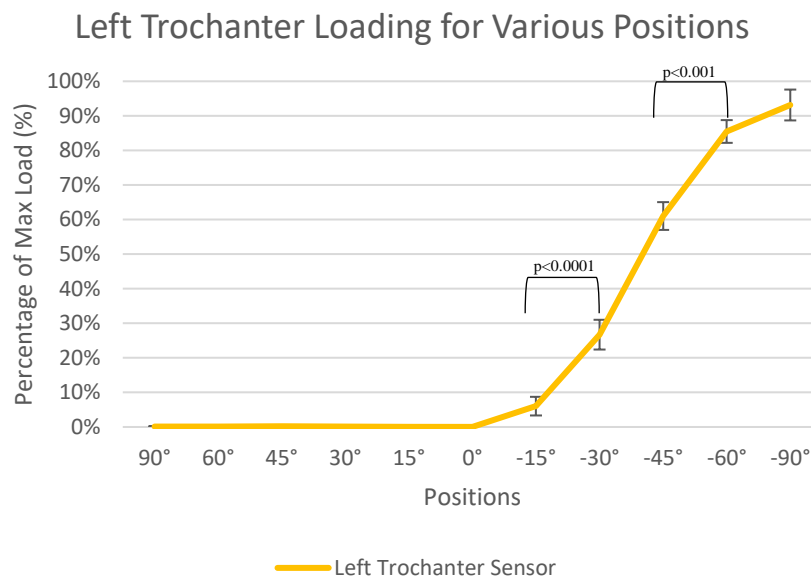

415  
416 **Figure 8.** Graph of the percentage of maximum load for the left trochanter sensor for all the  
417 primary positions. The error bars represent the standard error.

418 **Right Trochanter** - The right trochanter loading data for positions 90° to 0° was analyzed  
419 and confirmed to be non-parametric. A Friedman's ANOVA was significant,  $\chi^2(5) =$   
420 78.48,  $p < 1 \times 10^{-14}$ .

421  
422 Multiple post-hoc Wilcoxon Rank Sum tests with Bonferroni corrections were used to  
423 compare adjacent primary positions to determine if there was a difference in percentage  
424 of maximum load. In total, five comparisons were made, changing the p-value needed  
425 to reach significance to  $p < 0.01$ . All comparisons except from 90° to 60° were  
426 statistically significant, 90° to 60°:  $V = 117$ ,  $p = 0.057$ ; 60° to 45°:  $V = 152$ ,  $p < 1 \times 10^{-4}$ ;  
427 45° to 30°:  $V = 146$ ;  $p < 0.001$ ; 30° to 15°:  $V = 153$ ,  $p < 1 \times 10^{-4}$ ; 15° to 0°:  $V = 140$ ,  $p <$   
428 0.01.

429  
430 Figure 9 shows the percentage of max load felt at the right trochanter as participants  
431 rotated through different positions and the significance between positions.

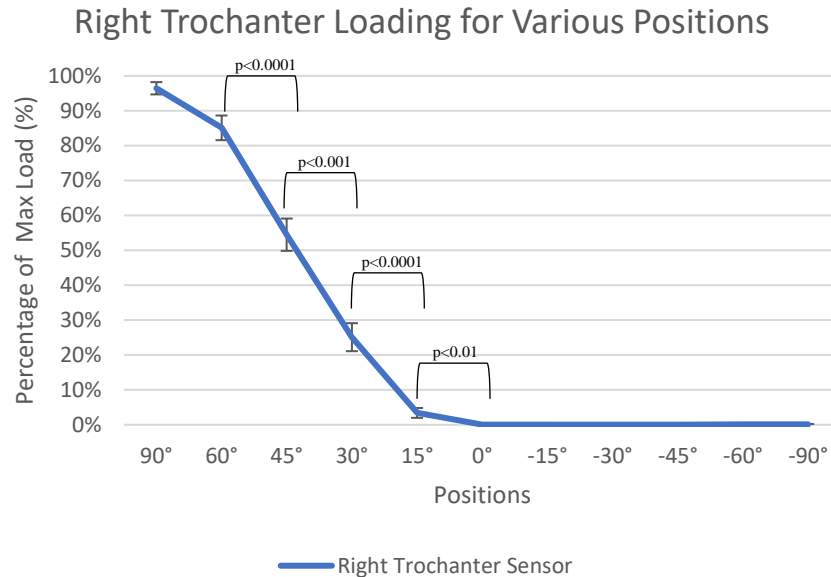

432  
 433 **Figure 9.** Graph of the percentage of maximum load for the right trochanter sensor for all the  
 434 primary positions. The error bars represent the standard error.

435  
 436 **Sacrum** - The sacral loading data for positions 90° to 0° was analyzed and confirmed to  
 437 be non-parametric. A Friedman’s ANOVA was significant,  $\chi^2(5) = 75.218$ ,  $p < 1 \times 10^{-14}$ .

438  
 439 Multiple post-hoc Wilcoxon Rank Sum tests with Bonferroni corrections were used to  
 440 compare adjacent primary positions to determine if there was a difference in percentage  
 441 of maximum load. In total, five comparisons were made, changing the p-value needed  
 442 to reach significance to  $p < 0.01$ . Four of the comparisons were statistically significant,  
 443 90° to 60°:  $V = 7$ ,  $p < 0.001$ ; 60° to 45°:  $V = 7$ ,  $p < 0.001$ ; 45° to 30°:  $V = 55$ ;  $p = 0.33$ ;  
 444 30° to 15°:  $V = 4$ ,  $p < 0.001$ ; 15° to 0°:  $V = 9$ ,  $p < 0.001$ .

445  
 446 The sacral loading data for positions -90° to 0° was analyzed and confirmed to be non-  
 447 parametric. A Friedman’s ANOVA was significant,  $\chi^2(5) = 67.679$ ,  $p < 1 \times 10^{-12}$ .

448  
 449 Multiple post-hoc Wilcoxon Rank Sum tests with Bonferroni corrections were used to  
 450 compare adjacent primary positions to determine if there was a difference in percentage  
 451 of maximum load. In total, five comparisons were made, changing the p-value needed  
 452 to reach significance to  $p < 0.01$ . Three of the comparisons were statistically significant  
 453 and one almost reached statistical significance, -90° to -60°:  $V = 10$ ,  $p < 0.01$ ; -60° to -  
 454 45°:  $V = 60$ ,  $p = 0.71$ ; -45° to -30°:  $V = 22$ ;  $p = 0.016$ ; -30° to -15°:  $V = 1$ ,  $p < 1 \times 10^{-4}$ ; -  
 455 15° to 0°:  $V = 13$ ,  $p = 0.0027$ .

456  
 457 Figure 10 shows the percentage of maximum load felt at the sacrum as participants  
 458 rotated through different positions and the significance between positions.

459

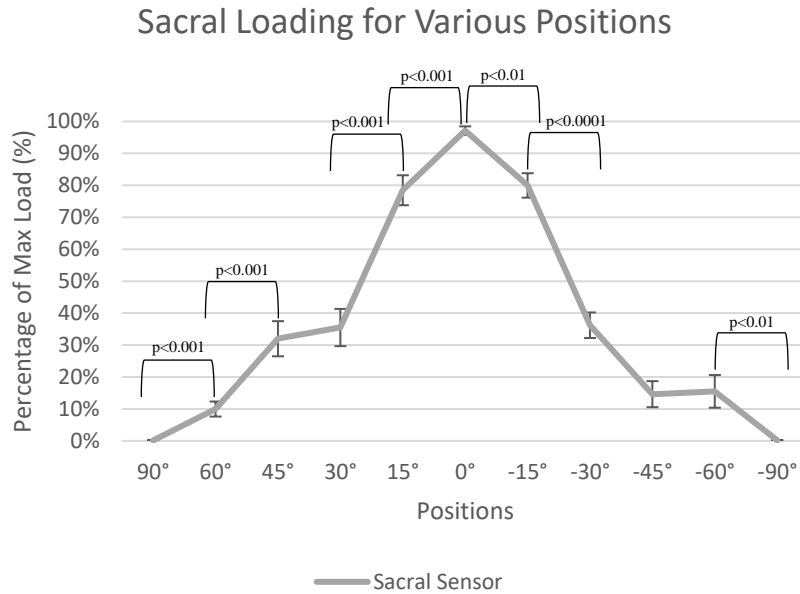

460  
461 **Figure 10.** Graph of the percentage of maximum load for the sacral sensor for all the primary  
462 positions. The error bars represent the standard error.

### 463 3.5 Level 2 Classification

464 Tables 12 and 13 show the overall mean accuracy and F1 scores with their respective  
465 standard deviation values across all 18 participants from Level 2 left and right  
466 classification using an ILL of 30%. Only the top two models are shown.

467  
468 **Table 12.** Table showing the mean accuracy and standard deviation values for the Level 2 Right  
469 and Left Classifications of different bin sizes for the top two models.

| Left  |                        |                        |                        |                        |
|-------|------------------------|------------------------|------------------------|------------------------|
| Model | Bin = ~70°             | Bin = 45°              | Bin = ~30°             | Bin = 15°              |
| GBC   | <b>77.46% ± 14.73%</b> | 73.57% ± 14.75%        | 64.18% ± 19.34%        | <b>56.20% ± 20.60%</b> |
| XGB   | 77.30% ± 15.28%        | <b>75.11% ± 14.80%</b> | <b>65.15% ± 20.91%</b> | 55.72% ± 20.36%        |

  

| Right |                        |                        |                        |                        |
|-------|------------------------|------------------------|------------------------|------------------------|
| Model | Bin = ~70°             | Bin = 45°              | Bin = ~30°             | Bin = 15°              |
| GBC   | 66.98% ± 17.55%        | 62.99% ± 19.78%        | 62.73% ± 19.96%        | 51.77% ± 25.63%        |
| XGB   | <b>68.83% ± 16.44%</b> | <b>67.74% ± 18.85%</b> | <b>65.19% ± 20.07%</b> | <b>52.49% ± 24.57%</b> |

470  
471 **Table 13.** Table showing the mean F1 scores and standard deviation values for the Level 2 Right  
472 and Left Classifications of different bin sizes for the top three models.

| Left  |                        |                        |                        |                        |
|-------|------------------------|------------------------|------------------------|------------------------|
| Model | Bin = ~70°             | Bin = 45°              | Bin = ~30°             | Bin = 15°              |
| GBC   | 0.7080 ± 0.1963        | 0.6907 ± 0.1855        | 0.6031 ± 0.2179        | <b>0.5425 ± 0.2022</b> |
| XGB   | <b>0.7159 ± 0.2011</b> | <b>0.7100 ± 0.1864</b> | <b>0.6213 ± 0.2312</b> | 0.5400 ± 0.2099        |

  

| Right |                        |                        |                        |                        |
|-------|------------------------|------------------------|------------------------|------------------------|
| Model | Bin = ~70°             | Bin = 45°              | Bin = ~30°             | Bin = 15°              |
| GBC   | 0.5914 ± 0.2299        | 0.5712 ± 0.2285        | 0.5780 ± 0.2224        | 0.4886 ± 0.2566        |
| XGB   | <b>0.6097 ± 0.2239</b> | <b>0.6181 ± 0.2305</b> | <b>0.6039 ± 0.2270</b> | <b>0.4996 ± 0.2573</b> |

473  
474 **Comparing Bin Sizes** - The data for Level 2 left classification was confirmed to be  
475 parametric for both mean accuracy and F1 scores. Two ANOVAs reported a significant  
476 difference between the different bin sizes for mean accuracies,  $F(68,3) = 5.004$ ,  $p =$   
477  $0.0034$ , and no significant difference for the mean F1 scores,  $F(68,3) = 2.714$ ,  $p =$   
478  $0.0516$ . Figures 11a and 11b show the best mean accuracies and F1 scores from each  
479 Level 2 right classification bin.  
480

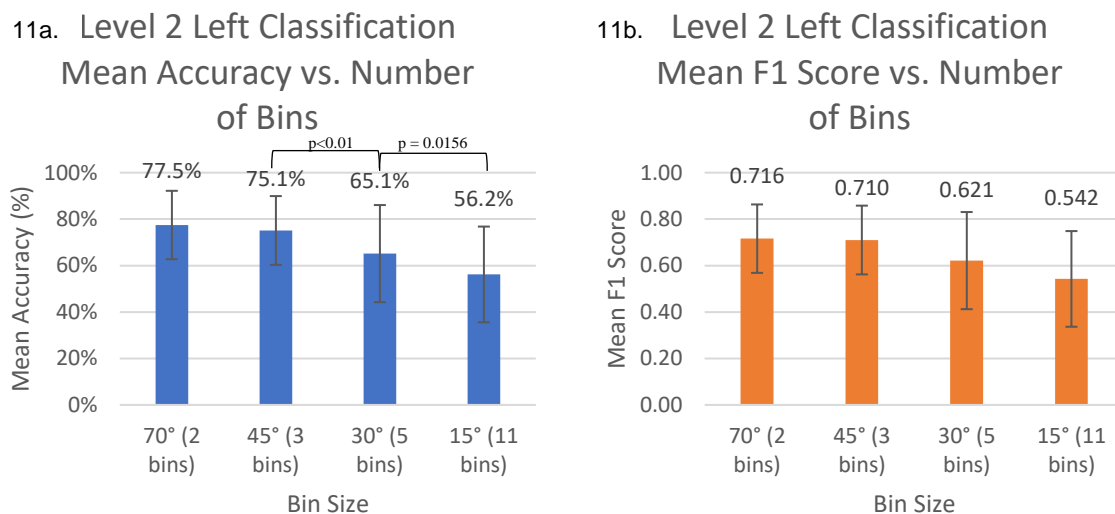

481  
482 **Figure 11a.** Graph of mean accuracy for the top models for Level 2 left classification for the four  
483 different bin sizes; **11b.** Graph of mean F1 score for the top models for Level 2 left classification  
484 for the four different bin sizes.

485 Multiple post-hoc t-tests with Bonferroni corrections were used to compare the adjacent  
486 bin sizes. In total, three comparisons were made, changing the p-value needed to reach  
487 significance to  $p < 0.017$ . For mean accuracy, the 45° vs 30° and 30° vs 15° bin  
488 comparisons were found to be statistically significant: 45° vs 30°:  $t(17) = 2.954$ ,  $p =$   
489  $0.00889$ ; 30° vs 15°:  $t(17) = 2.685$ ,  $p = 0.0156$ , respectively.

490  
491 The data for Level 2 right classification was confirmed to be parametric for both mean  
492 accuracies and F1 scores. Two ANOVAs reported no significant difference between the  
493 different bin sizes for mean accuracies,  $F(68,3) = 2.369$ ,  $p = 0.0782$ , and F1 scores,  
494  $F(68,3) = 0.959$ ,  $p = 0.417$ . Figures 12a and 12b show the best mean accuracies and  
495 F1 scores from each Level 2 right classification bin. No post-hoc tests were performed.  
496



12a. Level 2 Right Classification  
Mean Accuracy vs. Number of  
Bins

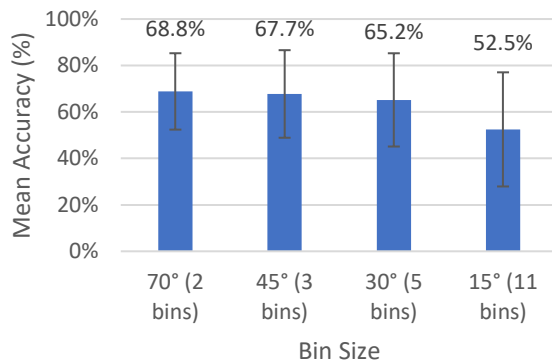

12a. Level 2 Right Classification  
Mean F1 Score vs. Number  
of Bins

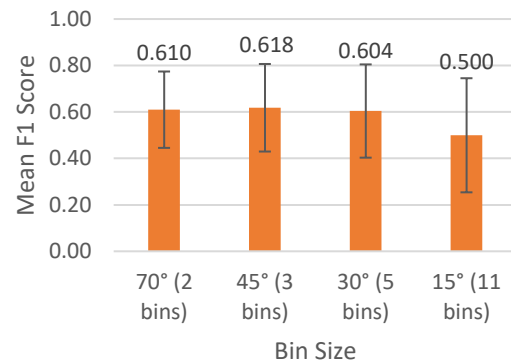

497  
498 **Figure 12a.** Graph of mean accuracy for the top models for Level 2 left classification for the four  
499 different bin sizes; **12b.** Graph of mean F1 score for the top models for Level 2 left classification  
500 for the four different bin sizes.

## 501 **4 Discussion**

### 502 **4.1 Level 1 Classification**

503 The best performing model was the XGBoost model with a mean accuracy of  $84.03\% \pm$   
504  $12.17\%$ , and mean F1 score of  $0.8399 \pm 0.1226$ . This accuracy is an improvement over  
505 the  $\sim 68\%$  that Wong et al.'s previous model was able to achieve on this data. It is likely  
506 that this accuracy represents an underestimate of the actual accuracy of our new  
507 system as the training set includes data without the IMU ground truth data.

508  
509 The deep learning methods generally performed worse than the machine learning  
510 models, except for the MLP 2 model which performed at a comparable level to the LGB.  
511 However, this model had an overly complicated architecture for the amount of data it  
512 was processing, so it may have overfit to the data. In general, the most likely reason for  
513 the poor performance of the CNN and RNN was the lack of data as deep learning  
514 traditionally relies on very large data sets.

515  
516 *Comparing Machine Learning Models* - The omnibus test found an overall significant  
517 difference between the performance of all models and post-hoc comparisons of the top  
518 three models found statistically significant differences. In terms of mean accuracy and  
519 F1 score, the XGB model performed significantly better than both the LGB and MLP 2  
520 models. For mean accuracy, the LGB and MLP 2 were found to have performed  
521 comparably, whereas for mean F1 score, the LGB model outperformed the MLP 2  
522 model. Therefore, the XGB model was statistically significantly better than the other  
523 models and should thus be included in future work when testing position prediction.

524  
525 *Comparing Incremental Learning Levels* - A Friedman's ANOVA showed a significant  
526 difference between the performance of the XGB model at different ILLs. Post-hoc tests  
527 further confirmed that there was a significant improvement in performance between

528 adjacent ILLs for both mean accuracy and F1 score as the ILL increased. This finding is  
529 important as it suggests that collecting data for incremental learning has the potential to  
530 better personalize the model to participants, thus improving their care. It is important to  
531 note that the test set for each participant in the study was limited ranging from 83 to 215  
532 observations (mean 151.1 observations), meaning that a maximum of 64 observations  
533 at 30% incremental learning were added to a data pool of ~20,000 observations for  
534 incremental learning. Considering that incremental learning with so few observations  
535 was able to improve the overall mean accuracy and F1 score by almost 10% and 0.1,  
536 respectively, for the XGB model, it would be important to further investigate the impacts  
537 of incremental learning with a larger data set. Additionally, it would be important to  
538 investigate whether the statistical significance of incremental learning translates to  
539 clinical significance and an improved prevention of PIs.

540

#### 541 **4.2 FSR Data**

542 *Left Trochanter* - The left trochanter was loaded for most angles between 0° and -90°  
543 (as shown in Figure 8). A Friedman's ANOVA indicated that there was a significant  
544 difference between the mean percentage of maximum force experienced on the left  
545 trochanter between different left-side lying positions. Post-hoc comparisons compared  
546 adjacent left positions and identified that the percentage of maximum force on the left  
547 trochanter was significantly different for -60° to -45° and -30° to -15°. Changes from -45°  
548 to -30° and -15° to 0° almost met significance. This finding indicates that rotating a  
549 participant from a more extreme position to a less extreme position between the  
550 positions -60° to -45° and -30° to -15° will result in significant offloading of the left  
551 trochanter compared to the previous position.

552

553 *Right Trochanter* - The right trochanter was loaded for most angles between 0° to 90°  
554 (as shown in Figure 9). A Friedman's ANOVA indicated that there was a significant  
555 difference between the mean percentage of maximum force experienced on the right  
556 trochanter between different right-side lying positions. Post-hoc comparisons compared  
557 adjacent right positions and identified that the percentage of maximum force on the right  
558 trochanter was significantly different for all adjacent positions except for 90° to 60°. This  
559 finding indicates that rotating a participant from a more extreme position to a less  
560 extreme position between the positions 60° to 45°, 45° to 30°, 30° to 15°, and 15° to 0°  
561 will result in significant offloading of the right trochanter compared to the previous  
562 position.

563

564 *Sacrum* - The sacrum was only completely offloaded at -90° and 90° (as shown in  
565 Figure 10). A Friedman's ANOVA reported a significant difference between the mean  
566 percentage of maximum force experienced on the sacrum between different right-side  
567 lying positions. Post-hoc comparisons compared adjacent right positions and identified  
568 that the percentage of maximum force on the sacrum was significantly different for all  
569 adjacent positions except for 45° to 30°. This finding indicated that rotating a participant  
570 from a less extreme position to a more extreme position between the positions 0° to 15°,  
571 15° to 30°, 45° to 60°, and 60° to 90° resulted in significant offloading of the sacrum  
572 compared to the previous position.

573

574 A Friedman's ANOVA reported a significant difference between the mean percentage of  
575 maximum force experienced on the sacrum between different left-side lying positions.  
576 Post-hoc comparisons were used to compare adjacent left positions and they identified  
577 that the percentage of maximum force on the sacrum was significantly different for -90°  
578 to -60°, -30° to -15°, and -15° to 0°. Changes from -45° to -30° almost met significance.  
579 This finding indicates that rotating a participant from a less extreme position to a more  
580 extreme position between the positions 0° to -15°, -15° to -30°, and -60° to -90° will  
581 result in significant offloading of the sacrum compared to the previous position.

582  
583 *Optimal Offloading* - The trochanter opposite to the side a patient was turned on will be  
584 completely offloaded, making the trochanters easier to offload than the sacrum. It  
585 appeared that the sacrum was not fully offloaded in any position that required the use of  
586 a support pillow as the patient's sacrum was likely pressed up against it. If complete  
587 offloading is required for adequate tissue healing, it may be necessary for patients to  
588 assume a side-lying position that can be maintained without the use of assistive device  
589 to maintain the position. If assistive devices are needed, it may be important to ensure  
590 they have a cut out around the sacral area to ensure it is being properly offloaded.

591  
592 *Optimal Bin Size* - The results indicated that the smallest bin size needed to detect  
593 meaningful changes in offloading is 15°. However, if patients require complete  
594 offloading to heal, then classifying positions as supine, left, or right will suffice. As such,  
595 it may be more important to focus on accurately detecting large positional changes like  
596 those in Level 1 classification to ensure offloading is occurring on a scheduled basis.  
597 More precise detection may be useful in recognizing smaller self-repositioning efforts  
598 and determining their impact on high-risk areas.

### 599 600 **4.3 Level 2 Classification**

601 Level 2 classification separates the *right*, *left*, and *supine* classifications from Level 1  
602 classification into smaller bins. Tables 12 and 13 summarize the results from the top two  
603 models for Level 2 classification of left and right bins based on bin size. The best  
604 performing models vary depending on bin size, but the XGB model was best in six out  
605 of eight cases for mean accuracy and seven out of eight for mean F1 score. The table  
606 also shows a trend of left-side positions being predicted correctly more often than right-  
607 side positions. The reason for this finding is currently unclear.

608  
609 *Comparing Bin Sizes* - Tables 12 and 13 and Figures 11 and 12 show the effect of bin  
610 size on prediction accuracy. The results show that the accuracy of predictions  
611 decreases as the precision, or number of bins, increases.

612  
613 ANOVAs indicated that the only significant difference in bin sizes was in the Level 2 left  
614 mean accuracy comparison. When further analyzed, post-hoc t-tests indicated that the  
615 45° vs 30° and 30° vs 15° bin comparisons were significant.

616  
617 These results are important because they indicate that there is likely a trade-off  
618 between accuracy and precision when making predictions. It will be important to  
619 optimize the bin size for this system to ensure it is recording and classifying movements

620 of interest. In the future, bin size should be optimized based on information gathered  
621 from offloading data and clinical expertise to decide what is the smallest positional  
622 change that needs to be captured.

623

#### 624 **4.4 Study Limitations**

625 This study included a number of technical and clinical limitations as described below:

626

627 The technical limitations of this study included:

- 628 1. Load cell data was filtered with customized parameters for each participant,  
629 which may have led to an increase in classification accuracy compared to using  
630 generic parameters.
- 631 2. Most of the training data did not contain IM ground truth, so it could have  
632 negatively impacted the accuracy.
- 633 3. The data set was too small to run one-shot learning to compare its accuracy with  
634 the current hierarchical approach.
- 635 4. The neural network architectures selected by hyperparameter tuning were very  
636 complicated and may have overfit the data.
- 637 5. Level 2 classification had an imbalance of positions that were  $>90^\circ$  and  $<-90^\circ$ ,  
638 which could have negatively impacted the prediction accuracy for more extreme  
639 positions.

640

641 The clinical limitations of this study included:

- 642 1. The patient population was predominantly young, healthy individuals, which likely  
643 did not reflect the performance with a population of older adults with/at-risk of PI.
- 644 2. Certain primary positions participants were asked to adopt were unnatural, which  
645 may have impacted the participants' abilities to relax/breathe normally.
- 646 3. Individuals were supported using pillows that were occasionally placed against  
647 the sacrum in side-lying positions, which could have resulted in overestimates in  
648 sacral load. Train clinicians would have likely avoided placing the support pillows  
649 against the sacrum.
- 650 4. The way in which the IMUs were attached could have been more reliable to  
651 ensure they did not move while patients were changing positions.
- 652 5. The FSRs were placed by participants under guidance of the author, which  
653 means they may not have been placed in the correct anatomical position every  
654 time.
- 655 6. The FSRs occasionally fell off the participants during the study and needed to be  
656 re-attached mid study.

657

#### 658 **4.5 Future Work**

659 Future work will include:

- 660 1. Collecting overnight data from at-risk patients in their own homes.
- 661 2. Revising pillow placement during offloading and trying out different repositioning  
662 aids to see the impacts on sacral loading.
- 663 3. Validate a safe way to use IMUs for overnight data collection of at-risk patients.
- 664 4. Treating the detection of patient position as a regression task instead of a  
665 classification task to evaluate performance.

666

## 667 **5 Conclusion**

668 The main findings of this study were:

- 669 1. An IMU mounted to the pelvis improved position detection accuracy for supine,  
670 left, or right from ~70% in our previous work to  $84.2\% \pm 11.8\%$  for the best  
671 performing model.
- 672 2. The right and left trochanters were completely offloaded for TPAs of  $0^\circ$  to  $90^\circ$   
673 and  $0^\circ$  to  $-90^\circ$ , respectively. The sacrum was only completely offloaded for TPAs  
674 of  $\geq 90^\circ$  and  $\leq -90^\circ$ , highlighting a potential limitation of the existing clinical  
675 guidelines suggesting individuals be rotated between TPAs of  $-40^\circ$  and  $40^\circ$ .
- 676 3. Prediction accuracy decreased as the precision increased.

677

## 678 **6 References**

- 679 1. Perez ED. Pressure ulcers: Updated guidelines for treatment and prevention. Vol.  
680 48, Geriatrics. 1993. p. 39-41+43.
- 681 2. Norton L, Parslow N, Johnston D, Ho C, A Afalavi. Best practice  
682 recommendations for the prevention and management of pressure injuries.  
683 Wounds Canada. 2017;
- 684 3. Gefen A, Soppi E. What is new in our understanding of pressure injuries : the  
685 inextricable association between sustained tissue deformations and pain and the  
686 role of the support surface. *Wound Pract Res.* 2020;28(2):58–66.
- 687 4. Lustig M, Wiggermann N, Gefen A. How patient migration in bed affects the sacral  
688 soft tissue loading and thereby the risk for a hospital-acquired pressure injury.  
689 2020;(December 2019):631–40.
- 690 5. Amit Gefen. The future of pressure ulcer prevention is here: Detecting and  
691 targeting inflammation early. *EWMA J [Internet].* 2018 [cited 2019 Nov  
692 28];19(2):7–13. Available from:  
693 [http://www.rcsi.ie/files/schoolofnursing/docs/20190122092031\\_JournalGefenThe](http://www.rcsi.ie/files/schoolofnursing/docs/20190122092031_JournalGefenThefutureofpressur.pdf)  
694 [utureofpressur.pdf](http://www.rcsi.ie/files/schoolofnursing/docs/20190122092031_JournalGefenThefutureofpressur.pdf)
- 695 6. Edsberg LE, Black JM, Goldberg M, McNichol L, Moore L, Sieggreen M. Revised  
696 National Pressure Ulcer Advisory Panel Pressure Injury Staging System. *J*  
697 *Wound, Ostomy Cont Nurs.* 2016 Nov 28;43(6):585–97.
- 698 7. Lyder CH, Preston J, Grady JN, Scinto J, Allman R, Bergstrom N, et al. Quality of  
699 Care for Hospitalized Medicare Patients at Risk for Pressure Ulcers. *Arch Intern*  
700 *Med [Internet].* 2001;161:1549–54. Available from: <https://jamanetwork.com/>
- 701 8. Krishnagopalan S, Johnson EW, Low LL, Kaufman LJ. Body positioning of  
702 intensive care patients: Clinical practice versus standards. *Crit Care Med*  
703 *[Internet].* 2002 [cited 2019 Nov 28];30(11):2588–92. Available from:  
704 [https://journals.lww.com/ccmjournal/Fulltext/2002/11000/Body\\_positioning\\_of\\_intensive\\_care\\_patients\\_.31.aspx?casa\\_token=ff\\_PMN56fKYAAAAA:62UjaPGJtDBpkrveBQxn17zSFH7vcGEEcQWbgMWCTVfK-hBAMyVi4vvHHO\\_eKuQ7f7X5WFiRCxbfqEUL8H3-JPc](https://journals.lww.com/ccmjournal/Fulltext/2002/11000/Body_positioning_of_intensive_care_patients_.31.aspx?casa_token=ff_PMN56fKYAAAAA:62UjaPGJtDBpkrveBQxn17zSFH7vcGEEcQWbgMWCTVfK-hBAMyVi4vvHHO_eKuQ7f7X5WFiRCxbfqEUL8H3-JPc)
- 705 9. Renganathan BS, Preejith SP, Nagaiyan S, Joseph J, Sivaprakasam M. A novel  
706 system to tackle hospital acquired pressure ulcers. In: Proceedings of the Annual  
707 International Conference of the IEEE Engineering in Medicine and Biology  
708  
709  
710



- 711 Society, EMBS [Internet]. 2016 [cited 2019 Jul 30]. p. 4780–3. Available from:  
712 <https://ieeexplore.ieee.org/abstract/document/7591796/>
- 713 10. Jankowski IM, Nadzam DM. Identifying gaps, barriers, and solutions in  
714 implementing pressure ulcer prevention programs. *Jt Comm J Qual Patient Saf*  
715 [Internet]. 2011 [cited 2019 Nov 28];37(6):253–64. Available from:  
716 <https://www.sciencedirect.com/science/article/pii/S155372501137033X>
- 717 11. Padula W V., Delarmente BA. The national cost of hospital-acquired pressure  
718 injuries in the United States. *Int Wound J*. 2019 Jun 1;16(3):634–40.
- 719 12. Wong G, Gabison S, Dolatabadi E, Evans G, Kajaks T, Holliday P, et al. Toward  
720 mitigating pressure injuries: Detecting patient orientation from vertical bed  
721 reaction forces. *J Rehabil Assist Technol Eng* [Internet]. 2020 [cited 2020 May  
722 7];7:205566832091216. Available from:  
723 <https://journals.sagepub.com/doi/pdf/10.1177/2055668320912168>
- 724 13. Gabison S, Pupic N, Evans G, Wong G, Fernie G, Dolatabadi E, et al. Measuring  
725 Repositioning in Home Care for Pressure Injury Prevention and Management (In  
726 prep.). *Wounds Canada*.
- 727 14. Beattie ZT, Hagen CC, Hayes TL. Classification of lying position using load cells  
728 under the bed. *Proc Annu Int Conf IEEE Eng Med Biol Soc EMBS*. 2011;474–7.
- 729 15. Liang H, Tsui BY, Ni H, Valentim CCS, Baxter SL, Liu G, et al. Evaluation and  
730 accurate diagnoses of pediatric diseases using artificial intelligence. *Nat Med*  
731 [Internet]. 2019 Mar 11 [cited 2021 Apr 15];25(3):433–8. Available from:  
732 <http://www.nature.com/articles/s41591-018-0335-9>  
733
